# Supplementary material for: Immune-privileged tissues formed from immunologically cloaked mouse embryonic stem cells survive long term in allogeneic hosts
Source: PubMed Central journal article supplement (PMC11087263; doi:10.1038/s41551-023-01133-y), 2023-11-23
Supplement: 41551_2023_1133_MOESM2_ESM.pdf [file 41551_2023_1133_MOESM2_ESM.pdf]

## Reporting Summary

Nature Portfolio wishes to improve the reproducibility of the work that we publish. This form provides structure for consistency and transparency in reporting. For further information on Nature Portfolio policies, see our [Editorial Policies](#) and the [Editorial Policy Checklist](#).

### Statistics

For all statistical analyses, confirm that the following items are present in the figure legend, table legend, main text, or Methods section.

n/a Confirmed

- The exact sample size ( $n$ ) for each experimental group/condition, given as a discrete number and unit of measurement
- A statement on whether measurements were taken from distinct samples or whether the same sample was measured repeatedly
- The statistical test(s) used AND whether they are one- or two-sided  
*Only common tests should be described solely by name; describe more complex techniques in the Methods section.*
- A description of all covariates tested
- A description of any assumptions or corrections, such as tests of normality and adjustment for multiple comparisons
- A full description of the statistical parameters including central tendency (e.g. means) or other basic estimates (e.g. regression coefficient) AND variation (e.g. standard deviation) or associated estimates of uncertainty (e.g. confidence intervals)
- For null hypothesis testing, the test statistic (e.g.  $F$ ,  $t$ ,  $r$ ) with confidence intervals, effect sizes, degrees of freedom and  $P$  value noted  
*Give  $P$  values as exact values whenever suitable.*
- For Bayesian analysis, information on the choice of priors and Markov chain Monte Carlo settings
- For hierarchical and complex designs, identification of the appropriate level for tests and full reporting of outcomes
- Estimates of effect sizes (e.g. Cohen's  $d$ , Pearson's  $r$ ), indicating how they were calculated

*Our web collection on [statistics for biologists](#) contains articles on many of the points above.*

### Software and code

Policy information about [availability of computer code](#)

Data collection

Zen 2011 (black edition), for the confocal images taken for immunostaining  
OpenLab 5.5.2, for bright-field images  
Bio-Rad CFX Manager 3.1, for qPCR data collection  
PerkenELmer Living Image V4.5, for Bioluminescent Imaging (BLI) collection  
Summit v6.2, for FACS (Beckman Coulter, MoFlow AStrios EQ cell sorter);  
Gallios software, for flow cytometry (Beckman Coulter, GALLIOS flow cytometer)

Data analysis

Bio-Rad CFX Manager 3.1, for qPCR analysis  
GraphPad Prism software v10, for all data processing.  
Kaluza 1.5 for and FlowJo v10, for flow-cytometry analysis  
Cytobank software, for Cytof data analysis  
PerkenELmer Living Image V4.5, for bioluminescence imaging (BLI) analysis  
Star tool, for Splinkerette PCR analysis  
Integrative Genomic Viewer (IGV), for Splinkerette PCR analysis  
Timmomatic for total RNA Seq, and Splinkerette for PCR analysis  
FASQC, for total RNA Seq (<https://www.bioinformatics.babraham.ac.uk/projects/fastqc>)  
Kalliso, for total RNA Seq analysis  
DESeq2, for total RNA Seq analysis  
R, for total RNA seq (<http://www.r-project.org>)

For manuscripts utilizing custom algorithms or software that are central to the research but not yet described in published literature, software must be made available to editors and reviewers. We strongly encourage code deposition in a community repository (e.g. GitHub). See the Nature Portfolio [guidelines for submitting code & software](#) for further information.

## Data

Policy information about [availability of data](#)

All manuscripts must include a [data availability statement](#). This statement should provide the following information, where applicable:

- Accession codes, unique identifiers, or web links for publicly available datasets
- A description of any restrictions on data availability
- For clinical datasets or third party data, please ensure that the statement adheres to our [policy](#)

The data for the teratoma-growth experiments (Figs. 2 and 4, and Extended Data Fig. 9) and for the blood-glucose experiments (Extended Data Fig. 10) are provided as Source Data. The raw and analysed datasets generated during the study are available for research purposes from the corresponding author on reasonable request.

## Research involving human participants, their data, or biological material

Policy information about studies with [human participants or human data](#). See also policy information about [sex, gender \(identity/presentation\), and sexual orientation](#) and [race, ethnicity and racism](#).

|                                                                    |                                                                            |
|--------------------------------------------------------------------|----------------------------------------------------------------------------|
| Reporting on sex and gender                                        | <input type="text" value="The study did not involve human participants."/> |
| Reporting on race, ethnicity, or other socially relevant groupings | <input type="text" value="—"/>                                             |
| Population characteristics                                         | <input type="text" value="—"/>                                             |
| Recruitment                                                        | <input type="text" value="—"/>                                             |
| Ethics oversight                                                   | <input type="text" value="—"/>                                             |

Note that full information on the approval of the study protocol must also be provided in the manuscript.

## Field-specific reporting

Please select the one below that is the best fit for your research. If you are not sure, read the appropriate sections before making your selection.

- Life sciences       Behavioural & social sciences       Ecological, evolutionary & environmental sciences

For a reference copy of the document with all sections, see [nature.com/documents/nr-reporting-summary-flat.pdf](https://www.nature.com/documents/nr-reporting-summary-flat.pdf)

## Life sciences study design

All studies must disclose on these points even when the disclosure is negative.

|                 |                                                                                                                                                                                                                 |
|-----------------|-----------------------------------------------------------------------------------------------------------------------------------------------------------------------------------------------------------------|
| Sample size     | <input type="text" value="The number of samples used in different experiments was determined in accordance with similar studies in the field."/>                                                                |
| Data exclusions | <input type="text" value="No data were intentionally excluded."/>                                                                                                                                               |
| Replication     | <input type="text" value="Replication numbers and attempts were carried out as deemed necessary, and are reported in the paper."/>                                                                              |
| Randomization   | <input type="text" value="Samples were randomized when possible."/>                                                                                                                                             |
| Blinding        | <input type="text" value="Blinding was either not deemed necessary, owing to the detection method, or not possible owing to the nature of the experiment (such as growth of visible subcutaneous teratomas)."/> |

## Reporting for specific materials, systems and methods

We require information from authors about some types of materials, experimental systems and methods used in many studies. Here, indicate whether each material, system or method listed is relevant to your study. If you are not sure if a list item applies to your research, read the appropriate section before selecting a response.

## Materials &amp; experimental systems

| n/a                                 | Involvement                         | Included in the study         |
|-------------------------------------|-------------------------------------|-------------------------------|
| <input type="checkbox"/>            | <input checked="" type="checkbox"/> | Antibodies                    |
| <input type="checkbox"/>            | <input checked="" type="checkbox"/> | Eukaryotic cell lines         |
| <input checked="" type="checkbox"/> | <input type="checkbox"/>            | Palaeontology and archaeology |
| <input type="checkbox"/>            | <input checked="" type="checkbox"/> | Animals and other organisms   |
| <input checked="" type="checkbox"/> | <input type="checkbox"/>            | Clinical data                 |
| <input checked="" type="checkbox"/> | <input type="checkbox"/>            | Dual use research of concern  |
| <input checked="" type="checkbox"/> | <input type="checkbox"/>            | Plants                        |

## Methods

| n/a                                 | Involvement                         | Included in the study  |
|-------------------------------------|-------------------------------------|------------------------|
| <input checked="" type="checkbox"/> | <input type="checkbox"/>            | ChIP-seq               |
| <input type="checkbox"/>            | <input checked="" type="checkbox"/> | Flow cytometry         |
| <input checked="" type="checkbox"/> | <input type="checkbox"/>            | MRI-based neuroimaging |

## Antibodies

## Antibodies used

Anti-mouse  
 anti-mouse CD3e (BD Biosciences 553058)  
 anti-mouse CD28 (BD Biosciences 553295)  
 anti-mouse PD-L1 (alexa488, Novus NBP1-43262AF488)  
 anti-mouse CD47, (BV421, BD Biosciences 740055)  
 anti-mouse CD200 (alexa647, BD Biosciences 565544)  
 anti-mouse FASL (Novus NBP1-97519)  
 anti-mouse H2-M3 (BD Biosciences 551769)  
 anti-mouse SERPINB9 (HycultBiotech HP8035)  
 anti-mouse CCL21 (R&D AF457)  
 anti-mouse MFGES (Biolegend 518603)  
 anti-mouse CD31 (Biolegend 102417)  
 anti-mouse Neurofilament (Fisher Scientific MS359R7)  
 anti-mouse SSEA1 (Sigma MAB4301)  
 anti-mouse OCT4 (Santa Cruz sc-8628)  
 anti-mouse Smooth Muscle Actin (Abcam ab5694)  
 anti-mouse FOXA2 (Abcam ab108422)  
 anti-mouse SOX17 (R&D AF1924)  
 anti-mouse Troponin (cTNT, abcam, ab8295)  
 anti-mouse H-2Kb (Biolegend 116511)  
 anti-mouse H-2Kq (Biolegend 115106)

Anti-human  
 anti-human PDL1 (APC, Biolegend 329708)  
 anti-human FALSG (PE, Biolegend 306406)  
 anti-human CD200 (APC/Cy7, Biolegend 329220)  
 anti-human CD47 (PerCP/Cy5, Biolegend 323109)  
 anti-human SERPINB9 (ThermoFisher MA5-17648)  
 anti-human CCL21 (R&D AF366-SP)  
 anti-human MFGES (R&D IC27671A)  
 anti-human CD45 (APC, BD Biosciences 560973)  
 anti-human CD3 (Pe-Cy5, BD Biosciences 561006)  
 anti-human HLA-A,B,C (APC, Biolegend 311409)  
 anti-human CD31 (Pe-Cy7, Biolegend 303118)  
 anti-human CD144 (PE, Biolegend 138009)  
 anti-human CD16/CD32 Fc blocker (BD Biosciences 553141)  
 anti-human Human TruStain FxC Fc blocker (Biolegend 422301)

Secondaries and Others  
 anti mouse IgG (alexa488, ThermoFisher A10680)  
 anti goat IgG (alexa488 ThermoFisher A27012)  
 anti-Rat Fc (alexa568 secondary antibody (ThermoFisher A21112).  
 anti-hamster (Dylight 488 Biolegend 405503)  
 anti-rat IgG (DyLight 549 Novus NBP1-72975)  
 anti-mouse (alexa647 ThermoFisher 21244)  
 Annexin V (BV421, Biolegend 640923)  
 PI (Biolegend, 421301)

## Validation

Antibody performance and validations are available from the vendor and/or manufacturer.

Experiments using antibodies included relevant negative biological controls, such as cells without transgene expression or undifferentiated cells. Antibodies relying on secondary antibodies also included secondary only-controls (no primary antibody).

## Eukaryotic cell lines

Policy information about [cell lines and Sex and Gender in Research](#)

|                                                                   |                                                                                                                                                                   |
|-------------------------------------------------------------------|-------------------------------------------------------------------------------------------------------------------------------------------------------------------|
| Cell line source(s)                                               | Mouse C67BL6/N C2 embryonic stem cells were derived in the Nagy lab and in The Centre for Phenogenomics. Human H1 embryonic stem cells were imported from WiCell. |
| Authentication                                                    | The cell lines were not authenticated before use.                                                                                                                 |
| Mycoplasma contamination                                          | All cell lines and cultures were routinely tested for mycoplasma, and only negative cultures were used for experiments.                                           |
| Commonly misidentified lines (See <a href="#">ICLAC</a> register) | No commonly misidentified cell lines were used.                                                                                                                   |

## Animals and other research organisms

Policy information about [studies involving animals](#); [ARRIVE guidelines](#) recommended for reporting animal research, and [Sex and Gender in Research](#)

|                         |                                                                                                                                                                                                                                                                                                              |
|-------------------------|--------------------------------------------------------------------------------------------------------------------------------------------------------------------------------------------------------------------------------------------------------------------------------------------------------------|
| Laboratory animals      | C57BL/6N (Strain 005304), C3H/HeJ (Strain 000659), FVB/NJ (Strain 001800), BALB/cJ (Strain 000651), and NSG mice (Stock 005557) were purchased from the Jackson Laboratory. CD1 (Stock 022) mice were purchased from Charles River.                                                                          |
| Wild animals            | The study did not involve wild animals.                                                                                                                                                                                                                                                                      |
| Reporting on sex        | Both male and female recipients were used in the study.                                                                                                                                                                                                                                                      |
| Field-collected samples | The study did not involve samples collected from the field.                                                                                                                                                                                                                                                  |
| Ethics oversight        | All mouse housing, husbandry, and procedures were performed in compliance with the Animals for Research Act of Ontario and the Guidelines of the Canadian Council on Animal Care. The animal protocols used in this study were approved by the Toronto Center for Phenogenomics (TCP) Animal Care Committee. |

Note that full information on the approval of the study protocol must also be provided in the manuscript.

## Flow Cytometry

### Plots

Confirm that:

- The axis labels state the marker and fluorochrome used (e.g. CD4-FITC).
- The axis scales are clearly visible. Include numbers along axes only for bottom left plot of group (a 'group' is an analysis of identical markers).
- All plots are contour plots with outliers or pseudocolor plots.
- A numerical value for number of cells or percentage (with statistics) is provided.

### Methodology

|                           |                                                                                                                                                                                                                                                                                                                                                                                                                                                                                                                                                                                |
|---------------------------|--------------------------------------------------------------------------------------------------------------------------------------------------------------------------------------------------------------------------------------------------------------------------------------------------------------------------------------------------------------------------------------------------------------------------------------------------------------------------------------------------------------------------------------------------------------------------------|
| Sample preparation        | To generate Klg-1, Klg-2, and cloaked human lines, transfected mouse or human ESCs were collected at 60–80% confluency, washed with FACS buffer (PBS + 1% BSA and 0.5% EDTA), stained with antibodies, resuspended in FACS buffer + 25mM HEPES, filtered into Falcon tubes with cell-strainer lids, and then FACS-sorted on a MoFlow Astrios EQ sorter.<br><br>Cells collected for Flow cytometry analysis only (no sorting) were prepared in an identical fashion, except the final suspension buffer did not contain 25mM HEPES. Cells were run on a GALLIOS flow cytometer. |
| Instrument                | For cell-sorting experiments (FACS), a MoFlo Astrios EQ cell sorter (Beckman Coulter, Miami, FL, USA) was used, equipped with 305-nm, 405-nm, 488-nm, 561-nm and 640-nm lasers.<br><br>For analysis, a GALLIOS flow cytometer, Beckman Coulter, equipped with 405-nm, 488-nm, 561-nm and 640-nm lasers.                                                                                                                                                                                                                                                                        |
| Software                  | FACS software: Summit v6.2 (Beckman Coulter);<br>Analysis software (for Gallios data): Kaluza v1.5 (Beckman Coulter) and FlowJo V10                                                                                                                                                                                                                                                                                                                                                                                                                                            |
| Cell population abundance | All lines that were FACS-sorted were analysed by post-sort analysis and compared to controls to ensure that the desired population was sorted. Extended Data Fig. 5b shows representative gating and cell-abundance graphs for the desired cell population.                                                                                                                                                                                                                                                                                                                    |
| Gating strategy           | All samples were first gated for live single cells using side-scatter pulse height and area along with a viability dye. Cells                                                                                                                                                                                                                                                                                                                                                                                                                                                  |

Gating strategy

without marker or factor expression, as well as single-color samples of the same cell type as the experimental samples, were used for negative controls to set gating and instrument compensation.

Tick this box to confirm that a figure exemplifying the gating strategy is provided in the Supplementary Information.
